# Supplementary material for: Dietary Intake and Body Mass Index Influence the Risk of Islet Autoimmunity in Genetically At-Risk Children: A Mediation Analysis Using the TEDDY Cohort
Source: Hindawi journal article supplement (doi:10.1155/2023/3945064), 2023-02-17
Supplement: f1 [file 3945064.f1.pdf]

**Supplementary material for Andrén Aronsson et al. *Dietary intake and body mass index influences the risk of islet autoimmunity in genetically at-risk children: a mediation analysis using the TEDDY cohort.***

**Figure S1.** Time-varying mediation with ordering of variables of  $A(t)$ ,  $M(t)$ ,  $L(t)$ . Causal graph where  $(L)$  represents confounders,  $(A)$  represents exposure,  $(M)$  represents mediator, and  $(Y)$  is the final outcome at a fixed time point. Note that  $Y$  replaces  $L(t)$  at the final time point. Abbreviations;  $L(0)$  = baseline covariates; HLA-genotype, country, and first degree relative with T1D.  $M(1)$  = growth, BMI z-scores at time point  $i$ .  $A(1)$  = energy intake from time point  $i-1$ . Figure by the authors WanderVeele and Tchetgen. (17), reprinted with permission from the Royal Statistical Society and © 2021 John Wiley & Sons, Inc.

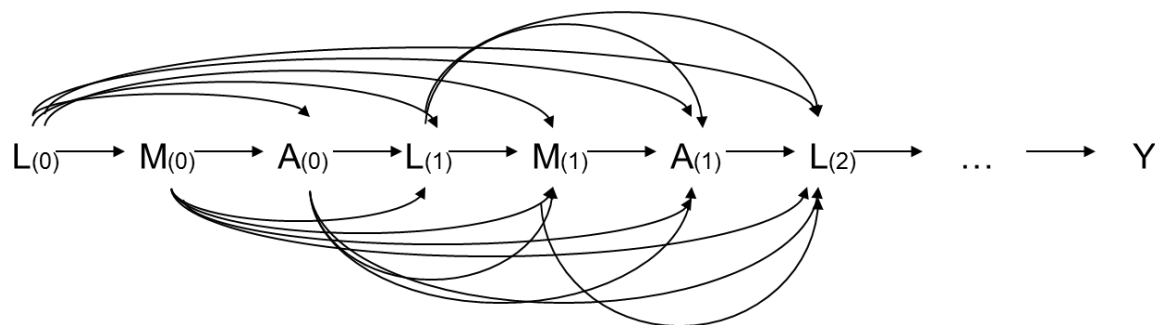

**Table S1.** Cross tabulation of BMI z-score  $\geq 1.5$  versus IA positivity at ages 3 through 8.

|                          | Age      |      |           |      |           |      |           |      |           |      |           |      |
|--------------------------|----------|------|-----------|------|-----------|------|-----------|------|-----------|------|-----------|------|
|                          | <b>3</b> |      | <b>4</b>  |      | <b>5</b>  |      | <b>6</b>  |      | <b>7</b>  |      | <b>8</b>  |      |
|                          | IA + (%) | N    | IA + (%)  | N    | IA + (%)  | N    | IA + (%)  | N    | IA + (%)  | N    | IA + (%)  | N    |
| BMI (z-score) <1.5       | 92 (2.0) | 4502 | 165 (3.7) | 4453 | 215 (4.9) | 4433 | 253 (5.7) | 4462 | 285 (6.4) | 4464 | 318 (7.2) | 4418 |
| BMI (z-score) $\geq 1.5$ | 15 (3.4) | 447  | 21 (4.2)  | 496  | 23 (4.5)  | 516  | 31 (6.4)  | 487  | 36 (7.4)  | 485  | 42 (7.9)  | 531  |
